# Supplementary material for: Excellent Performances of Composite Polymer Electrolytes with Porous Vinyl-Functionalized SiO2 Nanoparticles for Lithium Metal Batteries
Source: MDPI journal article supplement (doi:10.3390/polym13152468), 2021-07-27
Supplement: s1 [file s1]

# Supporting information

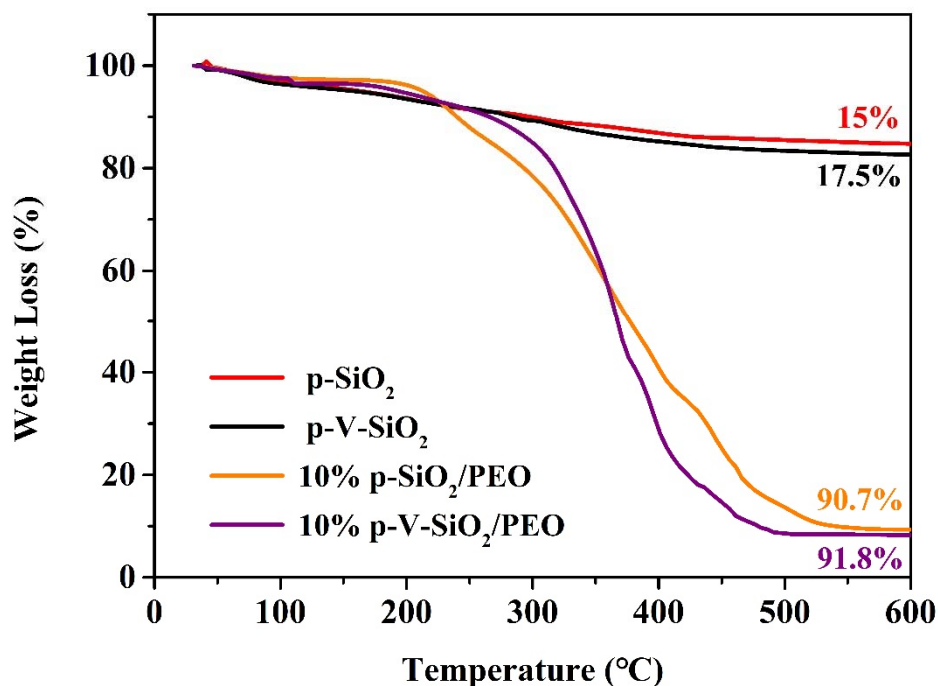

Figure S1. TGA data of p-SiO<sub>2</sub>, p-V-SiO<sub>2</sub>, 10% p-SiO<sub>2</sub>/PEO and 10% p-V-SiO<sub>2</sub>/PEO

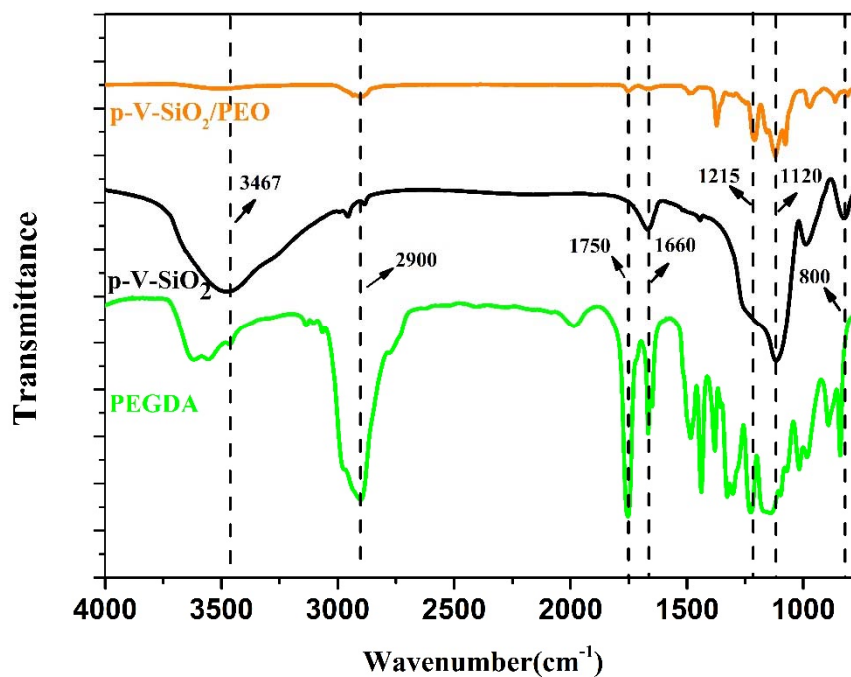

Figure S2. FT-IR spectra of PEGDA, p-V-SiO<sub>2</sub> and 10% p-V-SiO<sub>2</sub>/PEO

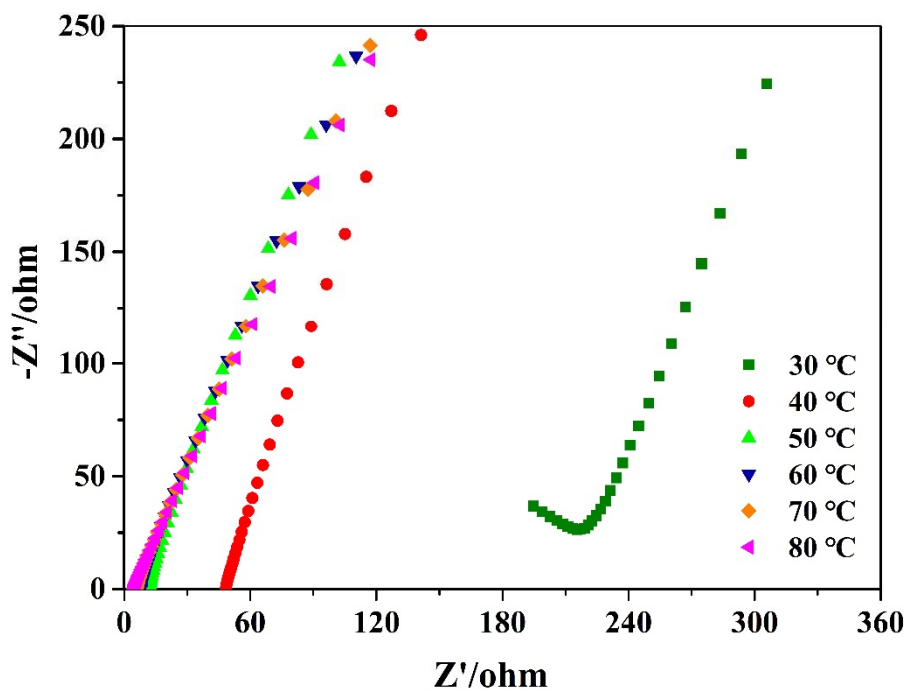

Figure S3. EIS profiles of 10% p-V-SiO<sub>2</sub>/PEO CPE at the range of at the range of 30-80 °C.

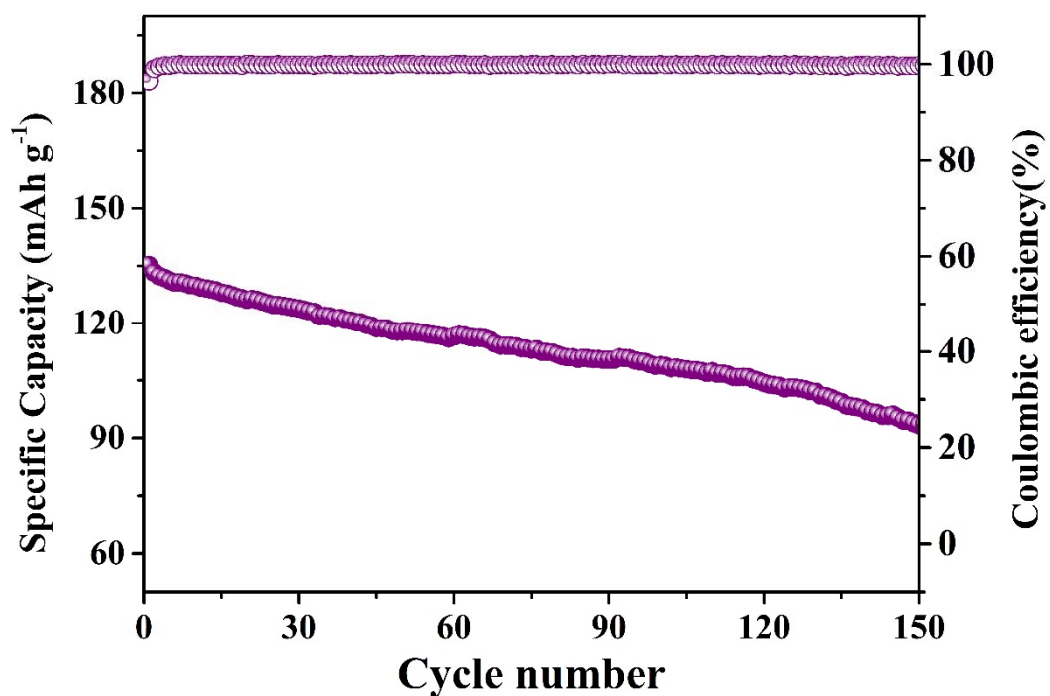

Figure S4: Cycle performance of Li|10% p-V-SiO<sub>2</sub>/PEO CPE|LiFP cells at 1 C at 60 °C.
